# Supplementary material
Source: PubMed Central journal article supplement (PMC5423850)
Supplement: NIHMS825708-supplement-supplement_1.pdf [file NIHMS825708-supplement-supplement_1.pdf]

| <b>Table E1: Demographic Characteristics (n=5,330)</b> |                       |
|--------------------------------------------------------|-----------------------|
|                                                        | N (%) or Median (IQR) |
| Males                                                  | 3,245 (61)            |
| Age (years)                                            | 8 (7, 10)             |
| <b>Race/Ethnicity</b>                                  |                       |
| White                                                  | 1,202 (23)            |
| Black                                                  | 3,024 (57)            |
| Hispanic                                               | 625 (12)              |
| Other                                                  | 479 (9)               |
| <b>Primary Source of Payment</b>                       |                       |
| Medicaid                                               | 3,418 (79)            |
| HMO                                                    | 435 (10)              |
| PPO                                                    | 448 (10)              |
| Length of stay (days)                                  | 3 (2, 4)              |
| PICU length of stay (days)                             | 1 (1, 2)              |
| <b>APR-DRG severity level</b>                          |                       |
| Minor (1)                                              | 1,929 (36)            |
| Moderate (2)                                           | 2,308 (43)            |
| Major (3)                                              | 903 (17)              |
| Extreme (4)                                            | 190 (4)               |
| Average                                                | 1.9                   |
| <b>Outcome</b>                                         |                       |
| Discharged                                             | 5,145 (99.9)          |
| Death                                                  | 7 (0.1)               |
